# Supplementary material
Source: PubMed Central journal article supplement (PMC6205219)

**Hypertrophic-Conductive**

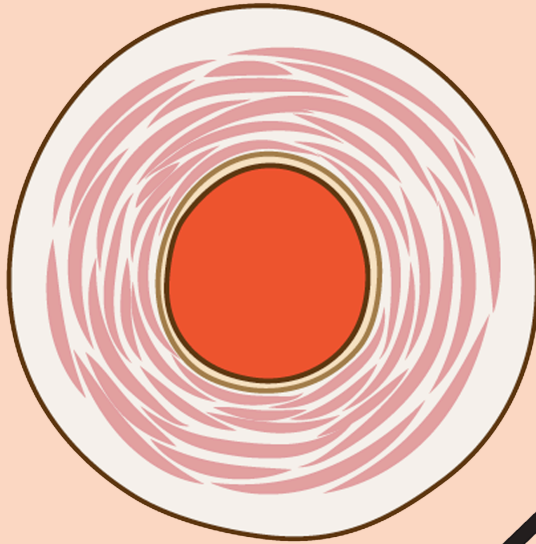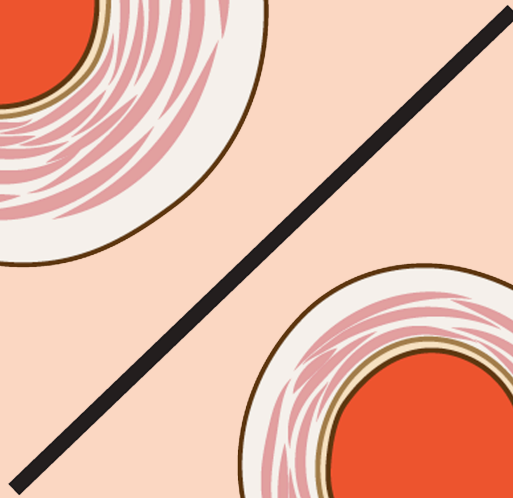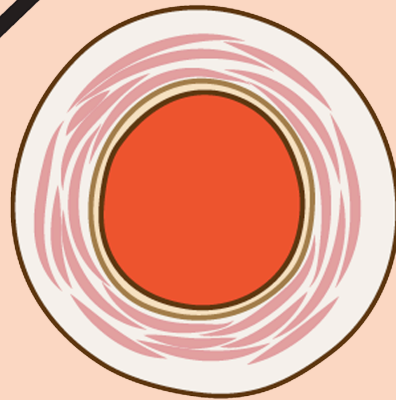

**Eutrophic-Resistance**

Supplement: NIHMS1500252-supplement-Legacy_Supplemental_File.pdf [file NIHMS1500252-supplement-Legacy_Supplemental_File.pdf]
